# Supplementary material for: Enhanced Adsorptive Bioremediation of Heavy Metals (Cd2+, Cr6+, Pb2+) by Methane-Oxidizing Epipelon
Source: PubMed Central journal article supplement (PMC7232255; doi:10.3390/microorganisms8040505), 2020-04-01
Supplement: microorganisms-08-00505-s001.pdf [file microorganisms-08-00505-s001.pdf]

## **Enhanced Adsorptive Bioremediation of Heavy Metals (Cd<sup>2+</sup>, Cr<sup>6+</sup>, Pb<sup>2+</sup>) by Methane-Oxidizing Epipelton**

Muhammad Faheem<sup>1,2</sup>, Sadaf Faheem<sup>3</sup>, Jun Zhao<sup>1</sup>, Philip G Kerr<sup>4</sup>, Nasrin Sultana <sup>1,2</sup>, and Zhongjun Jia<sup>1\*</sup>

<sup>1</sup>State Key Laboratory of Soil and Sustainable Agriculture, Institute of Soil Science, Chinese Academy of Sciences, Nanjing, 210008, Jiangsu Province, P.R. China

<sup>2</sup>University of Chinese Academy of Sciences, Beijing, 100049, China

<sup>3</sup>College of Environment, Hohai University, 1 Xikang Road, Nanjing, China

<sup>4</sup>School of biomedical Science, Charles Sturt University, Wagga Wagga, NSW 2678, Australia.

\*Corresponding author: Dr Zhongjun Jia

Email: [jia@issas.ac.cn](mailto:jia@issas.ac.cn)

### **This SOM file contains:**

Supplementary Table S1 to S4

Supplementary Figure S1 to S5

Supplementary References

**Table S1.** Primers and PCR conditions used in this study

| <b>Primer name</b> | <b>Primer sequence (5'-3')</b> | <b>Targeted gene</b>    | <b>Thermal condition</b>                                                                                                                          | <b>Molecular analysis</b> | <b>Reference</b> |
|--------------------|--------------------------------|-------------------------|---------------------------------------------------------------------------------------------------------------------------------------------------|---------------------------|------------------|
| <b>515F</b>        | GTGCCAGCMGCCGCGG               | universal 16S rRNA gene | 95 °C, 5 min; 33× (95 °C, 30 s; 54 °C, 30 s; 72 °C, 30 s); 72 °C, 8 min                                                                           | MiSeq sequencing          | [1]              |
| <b>907R</b>        | CCGTCAATTCMTTTRAGTTT           |                         |                                                                                                                                                   |                           |                  |
| <b>A189F</b>       | GGNGACTGGGACTTCTGG             | <i>pmoA</i> gene        | 95 °C, 3 min; 35× (95 °C, 10 s; 54 °C, 30 s; 72 °C, 30 s; 80 °C, 5 s; plate read); melt curve 65 °C to 95 °C, incremental 0.5 °C, 0:05+plate read | Real-time PCR             | [2,3]            |
| <b>mb661r</b>      | CCGGMGCAACGTCYTTACC            |                         | 95 °C, 5 min; 35 95 °C, 30s; 54 °C, 30 s; 72 °C, 45 s); 72 °C, 10 min                                                                             | MiSeq sequencing          |                  |

**Table S2.** Summary of MiSeq amplicon sequencing of 16S rRNA genes from total DNA sample

| <b>Treatment</b>                                 | <b>High Quality Read Number</b> |                    |                    |
|--------------------------------------------------|---------------------------------|--------------------|--------------------|
|                                                  | <b>Replicate-1</b>              | <b>Replicate-2</b> | <b>Replicate-3</b> |
| <b>6 ppm <sup>13</sup>CH<sub>4</sub></b>         | 46980                           | 48980              | 51980              |
| <b>120000 ppm <sup>13</sup>CH<sub>4</sub></b>    | 54713                           | 571157             | 55654              |
| <b>Cr+120000 ppm <sup>13</sup>CH<sub>4</sub></b> | 23343                           | 27124              | 24463              |
| <b>Pb+120000 ppm <sup>13</sup>CH<sub>4</sub></b> | 55454                           | 66328              | 56110              |
| <b>Cd+120000 ppm <sup>13</sup>CH<sub>4</sub></b> | 43119                           | 45264              | 40069              |

**Table S3.** Summary of Illumina MiSeq amplicon sequencing of *pmoA* genes from total DNA

| <b>Treatment</b>                            | <b>High Quality Read Number</b> |                         |
|---------------------------------------------|---------------------------------|-------------------------|
|                                             | <b>16S rRNA gene</b>            | <b><i>pmoA</i> gene</b> |
| 120000 ppm <sup>13</sup> CH <sub>4</sub>    | 59575                           | 17145                   |
| Cr+120000 ppm <sup>13</sup> CH <sub>4</sub> | 21432                           | 5600                    |
| Pb+120000 ppm <sup>13</sup> CH <sub>4</sub> | 58616                           | 14521                   |
| Cd+120000 ppm <sup>13</sup> CH <sub>4</sub> | 55432                           | 12518                   |

**Table S4** Topological properties of the co-occurrence networks of lake microbial communities

| <b>Network parameter</b> | <b>Cr+120000 ppm<br/><sup>13</sup>CH<sub>4</sub></b> | <b>Pb+120000 ppm<br/><sup>13</sup>CH<sub>4</sub></b> | <b>Cd+120000 ppm<br/><sup>13</sup>CH<sub>4</sub></b> | <b>120000 ppm<br/><sup>13</sup>CH<sub>4</sub></b> | <b>6 ppm <sup>13</sup>CH<sub>4</sub></b> |
|--------------------------|------------------------------------------------------|------------------------------------------------------|------------------------------------------------------|---------------------------------------------------|------------------------------------------|
| <b>Nodes</b>             | 156                                                  | 256                                                  | 269                                                  | 287                                               | 178                                      |
| <b>Edges</b>             | 2128                                                 | 4228                                                 | 4526                                                 | 5128                                              | 2728                                     |
| <b>Average Degree</b>    | 1.11                                                 | 1.65                                                 | 1.71                                                 | 1.87                                              | 1.23                                     |
| <b>Network diameter</b>  | 10                                                   | 10                                                   | 10                                                   | 10                                                | 10                                       |
| <b>Graph density</b>     | 0.0952                                               | 0.166                                                | 0.173                                                | 0.182                                             | 0.097                                    |
| <b>Modularity</b>        | 0.17                                                 | 0.18                                                 | 0.19                                                 | 0.193                                             | 0.181                                    |
| <b>Network distance</b>  | 1.65                                                 | 2.23                                                 | 2.34                                                 | 2.54                                              | 1.88                                     |

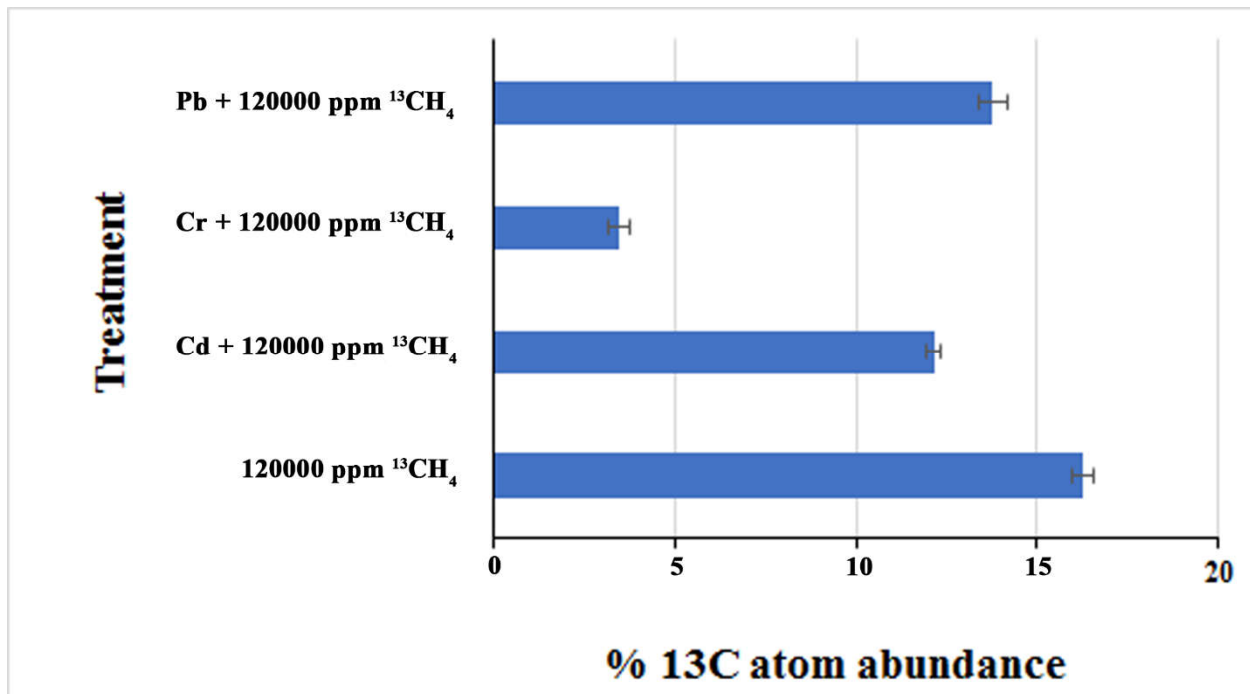

**Fig S1.** Percentage of  $^{13}\text{C}$  atoms abundance accumulated by methanotrophs in Epipelon

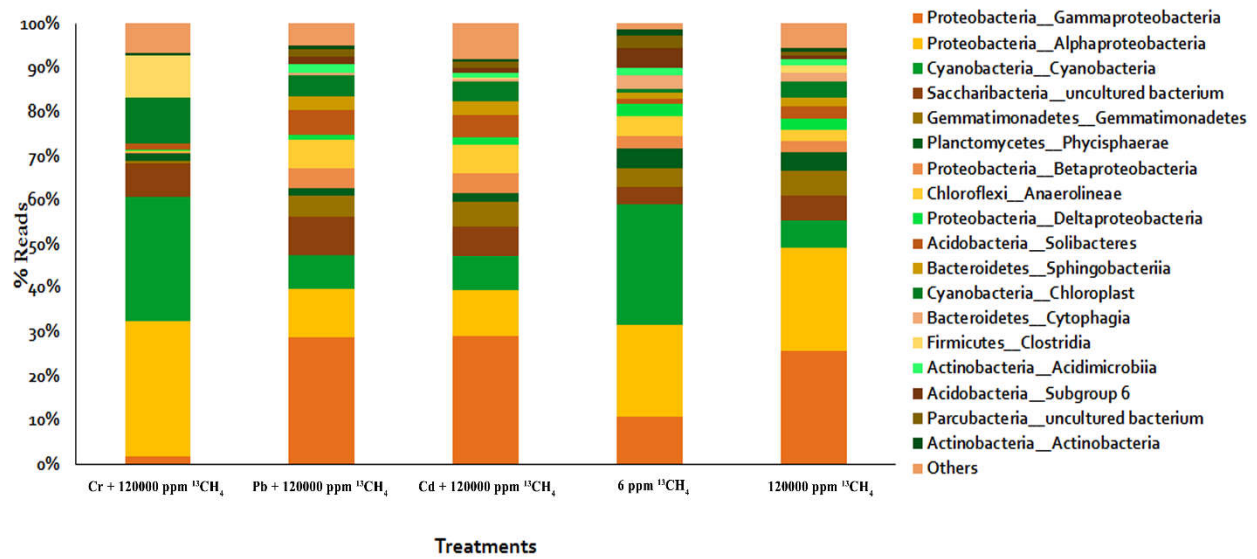

**Figure S2.** The changes in community composition of microbes following microcosm incubation with respective methane doses based on high throughput sequencing of 16S rRNA genes at class level.

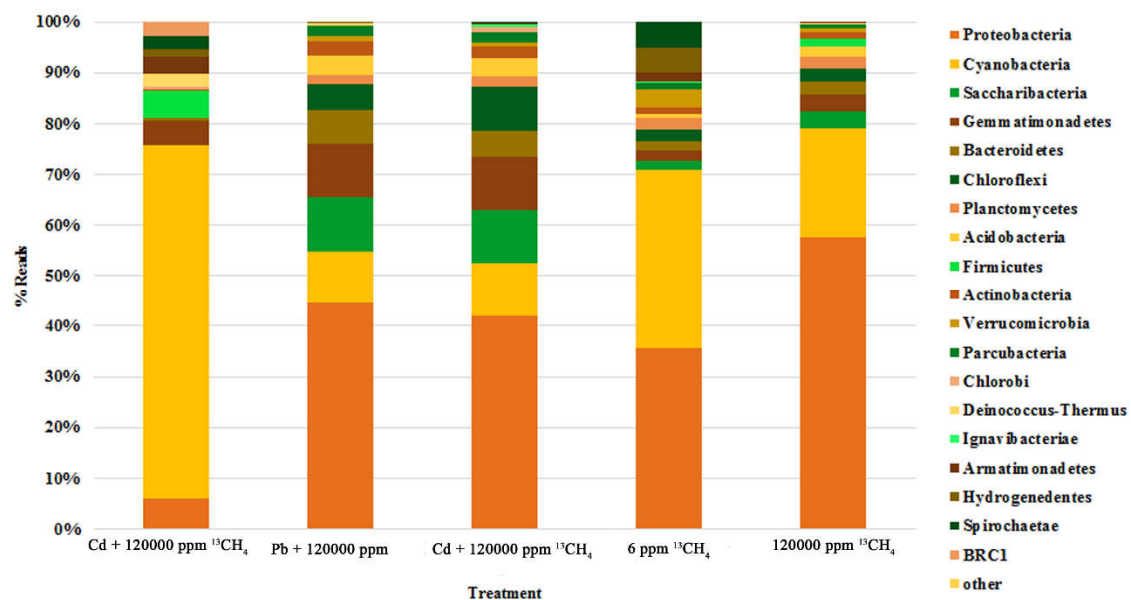

**Figure S3.** The changes in community composition of microbes following microcosm incubation with respective methane doses based on high throughput sequencing of 16S rRNA genes at phylum level.



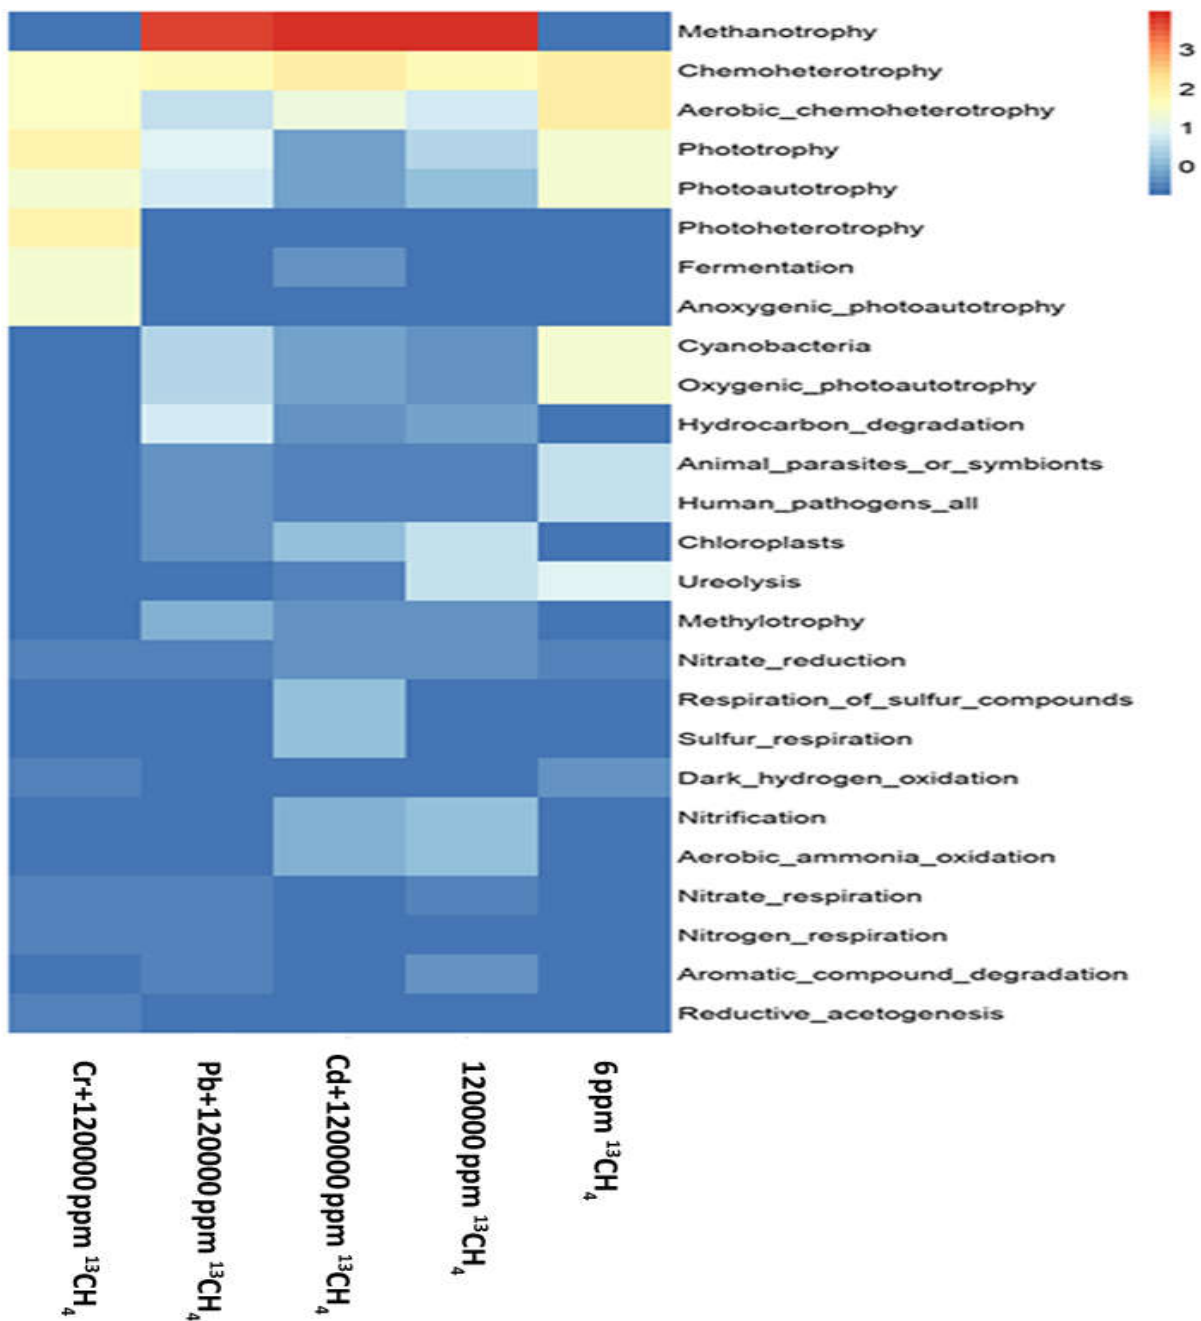

**Figure S4.** Functional phenat map of Epipelton under different methane and metals doses

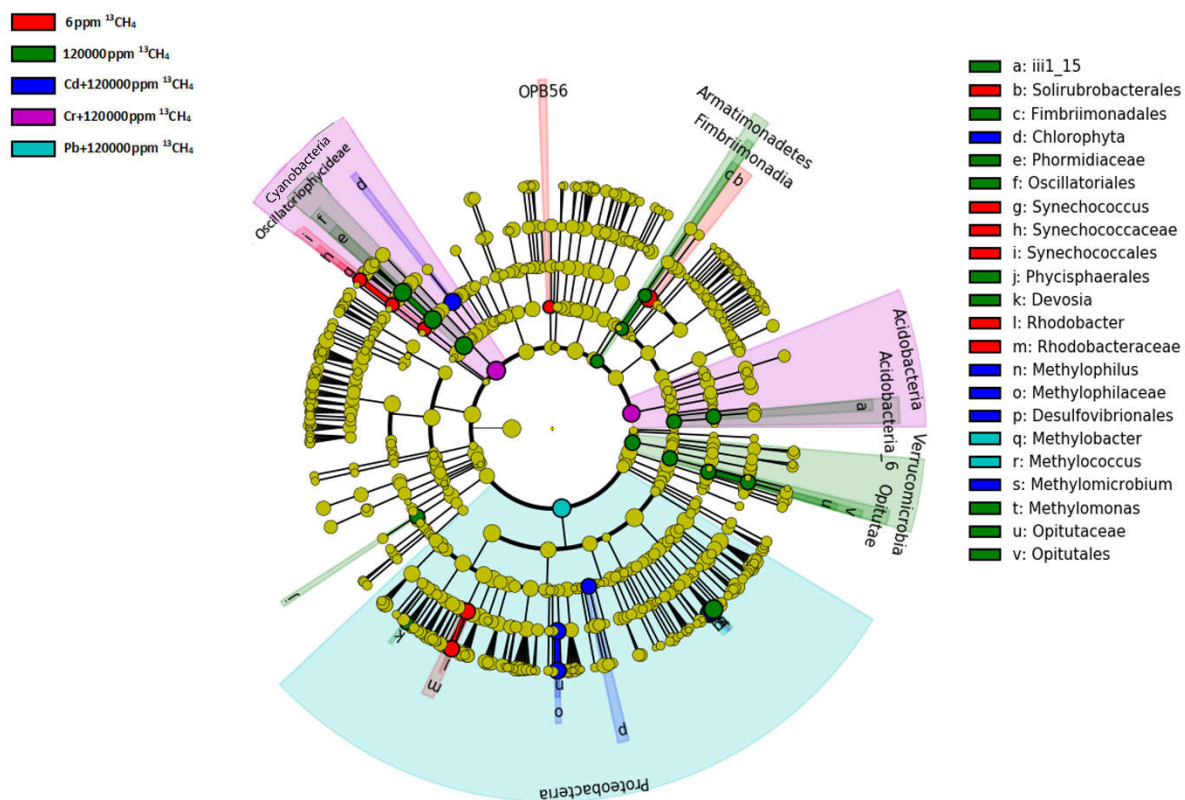

**Figure S5.** linear discriminant analysis effect size pipeline (LEfSe) analysis for dominant phyla, class and species.

## References

1. Stubner, S. Enumeration of 16S rDNA of Desulfotomaculum lineage 1 in rice field soil by real-time PCR with SybrGreen™ detection. *Journal of Microbiological Methods* **2002**, *50*, 155-164, doi:[https://doi.org/10.1016/S0167-7012\(02\)00024-6](https://doi.org/10.1016/S0167-7012(02)00024-6).
2. Costello, A.M.; Lidstrom, M.E. Molecular characterization of functional and phylogenetic genes from natural populations of methanotrophs in lake sediments. *Applied and environmental microbiology* **1999**, *65*, 5066-5074.
3. Holmes, A.J.; Costello, A.; Lidstrom, M.E.; Murrell, J.C. Evidence that particulate methane monooxygenase and ammonia monooxygenase may be evolutionarily related. *FEMS Microbiol Lett* **1995**, *132*, 203-208, doi:10.1016/0378-1097(95)00311-r.
